# Supplementary material for: A mechanistic model of infection: why duration and intensity of contacts should be included in models of disease spread
Source: Springer Nature journal article supplement (doi:10.1186/1742-4682-6-25), 2009-11-17

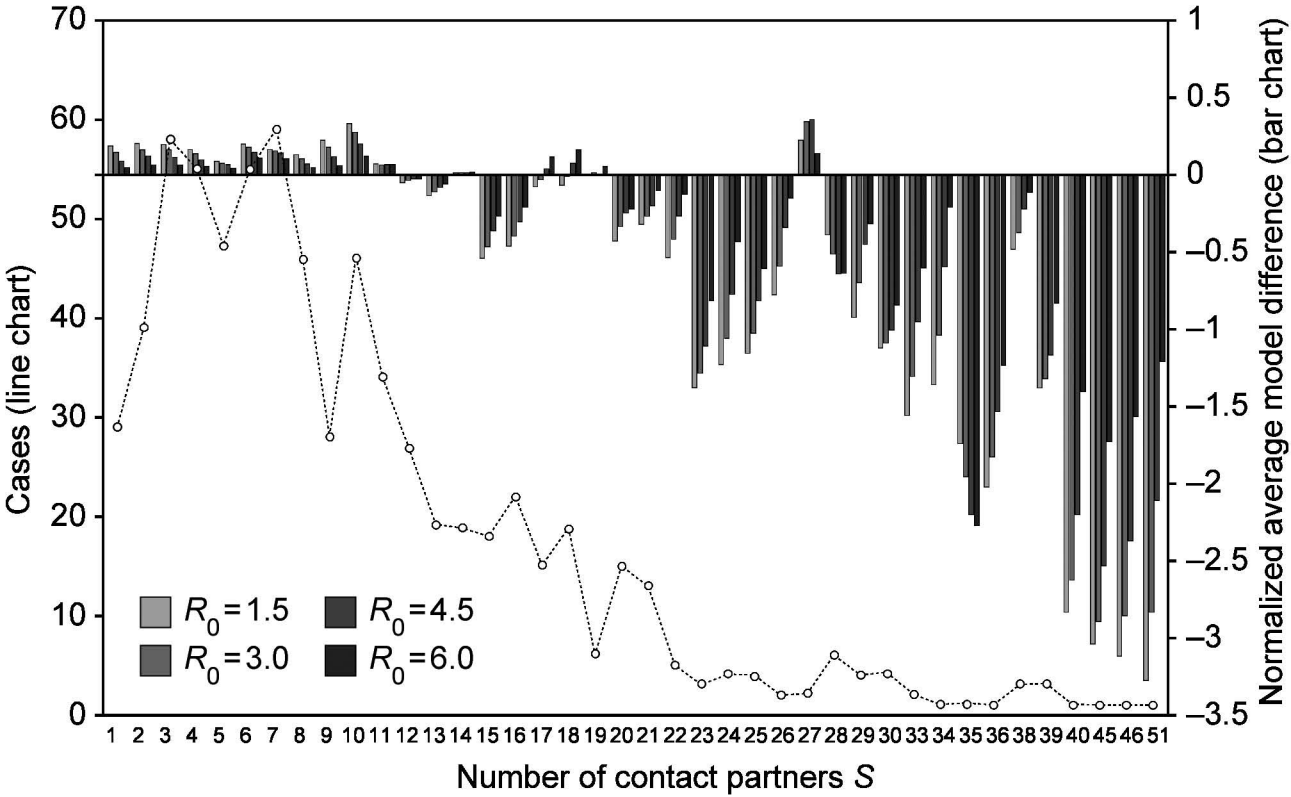

Supplement: 12976_2009_207_MOESM4_ESM.pdf [file 12976_2009_207_MOESM4_ESM.pdf]
